# Supplementary material
Source: ML conference proceedings conference paper supplement (https://proceedings.neurips.cc/paper_files/paper/2020/hash/e97c864e8ac67f7aed5ce53ec28638f5-Abstract.html)
Supplement: Supplementary file [file e97c864e8ac67f7aed5ce53ec28638f5-Supplemental.zip]

▼ True    ● G0    ● G1    ● G2    ● G3    ● G4

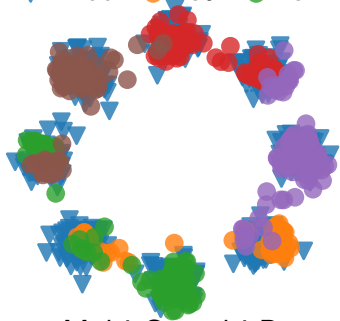

Multi G, multi D

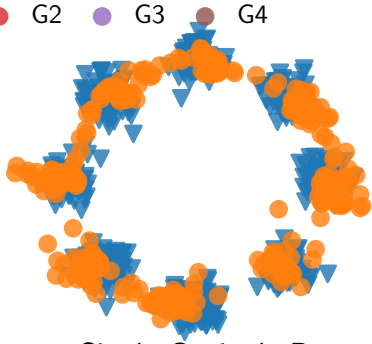

Single G, single D
