# Supplementary material
Source: ML conference proceedings conference paper supplement (https://proceedings.neurips.cc/paper_files/paper/2020/hash/e97c864e8ac67f7aed5ce53ec28638f5-Abstract.html)
Supplement: Supplementary file [file e97c864e8ac67f7aed5ce53ec28638f5-Supplemental.zip]

G0

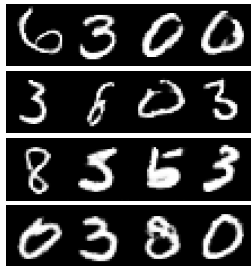

G1

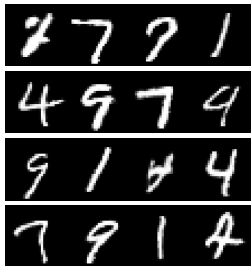

MNIST images, WFR, 2 gen. 2 discr.
